# Supplementary material
Source: publisher figshare collection journal article supplement (https://acs.figshare.com/ndownloader/files/23681754)
Supplement: Supplementary file 1 [file 23681754]

# Supporting Information

## Electrochemical long period fiber grating sensing for electroactive species

Takuya Okazaki,<sup>\*,†,‡</sup> Tatsuya Orii, <sup>†</sup>Shin-Yinn Tan,<sup>§</sup> Tomoaki Watanabe,<sup>‡</sup> Akira Taguchi,<sup>¶</sup> Faizd A. Rahman,<sup>#</sup> and Hideki Kuramitz,<sup>†</sup>

<sup>†</sup>Department of Environmental Biology and Chemistry, Graduate School of Science and Engineering for Research, University of Toyama, 3190 Gofuku, Toyama 930-8555, Japan

<sup>‡</sup>Department of Applied Chemistry, School of Science and Technology, Meiji University, 1-1-1, Higashimita, Tama-ku, Kawasaki, Kanagawa 214-8571, Japan

<sup>§</sup>Faculty of Engineering and Green Technology, Universiti Tunku Abdul Rahman, Jalan Universiti, Bandar Barat, 39100 Kampar, Malaysia

<sup>¶</sup>Hydrogen Isotope Research Center, University of Toyama, 3190 Gofuku, Toyama 930-8555, Japan

<sup>#</sup>Lee Kong Chian Faculty of Engineering and Science, Universiti Tunku Abdul Rahman, Jalan Genting Kelang, 53300 Setapak, Kuala Lumpur, Malaysia

### Corresponding Author

\*E-mail: okazaki@meiji.ac.jp. Tel. & Fax: +81 44 934 7224

### Table of content

Figure S1. Current values of methylene blue and  $\text{Ru}(\text{NH}_3)_6^{3+}$  obtained using the ITO-coated LPFG sensor as a function of applied potential for 200 s.

Figure S2. Cyclic voltammogram of 1 mM  $\text{Ru}(\text{NH}_3)_6^{3+}$  obtained by the ITO coated on LPFG and difference in the transmittance value at 1550 nm with and without  $\text{Ru}(\text{NH}_3)_6^{3+}$ .

Figure S3. Cyclic voltammogram of 0.1 mM ferrocyanide obtained by ITO coated on LPFG and the difference in the transmittance value at 1542 nm with and without ferrocyanide.

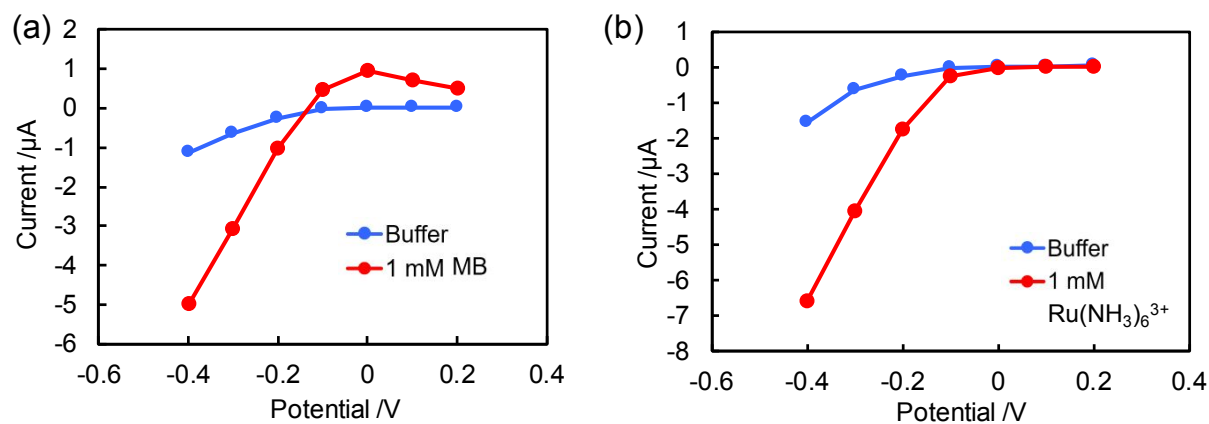

**Figure S1.** Current values of methylene blue (a) and  $\text{Ru}(\text{NH}_3)_6^{3+}$  (b) obtained using the ITO-coated LPFG sensor as a function of applied potential for 200 s.

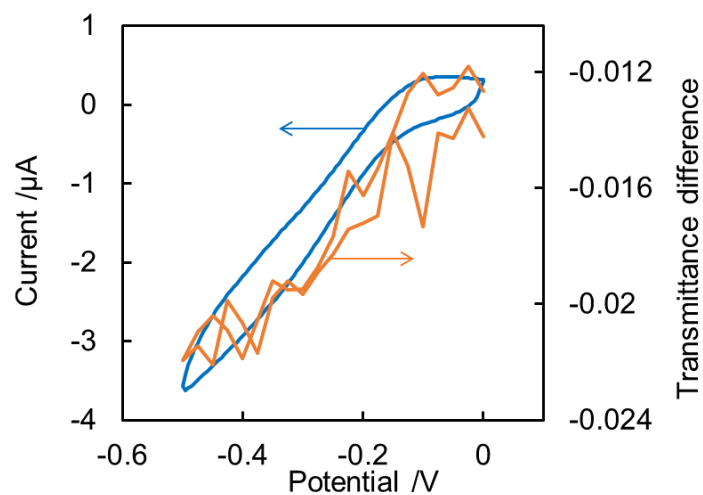

**Figure S2.** Cyclic voltammogram of 1 mM  $\text{Ru}(\text{NH}_3)_6^{3+}$  obtained by the ITO coated on LPFG and difference in the transmittance value at 1550 nm with and without  $\text{Ru}(\text{NH}_3)_6^{3+}$ .

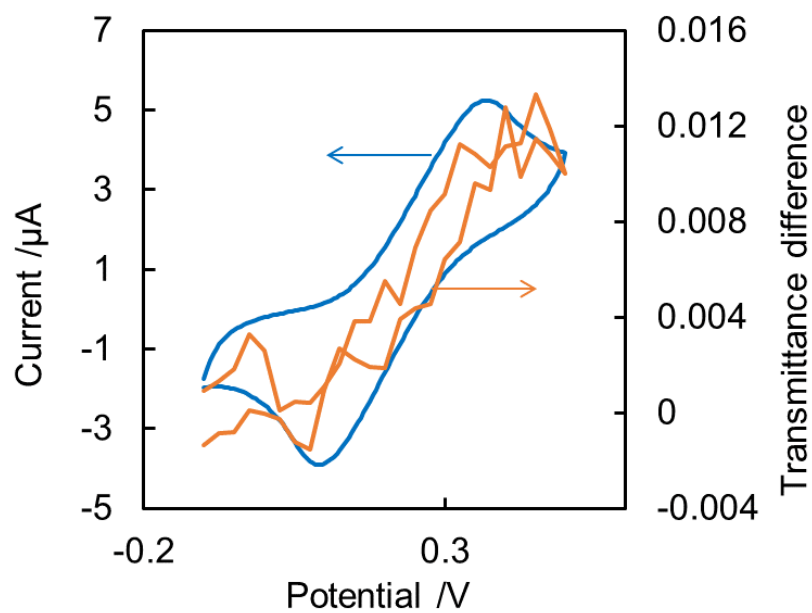

**Figure S3.** Cyclic voltammogram of 0.1 mM ferrocyanide obtained by ITO coated on LPFG and the difference in the transmittance value at 1542 nm with and without ferrocyanide.
